# Supplementary material for: The Arkadia-ESRP2 axis suppresses tumor progression: analyses in clear-cell renal cell carcinoma
Source: PubMed Central journal article supplement — Oncogene. 2015 Nov 2;35(27):3514–23. doi: 10.1038/onc.2015.412 (PMC5399154; doi:10.1038/onc.2015.412), 2015-11-02
Supplement: onc2015412x2.pdf [file onc2015412x2.pdf]

Supplementary Table S1: Gene sets enriched in genes down-regulated by ESRP2 and Arkadia in OS-RC-2 cells.

Pre-ranked gene set enrichment analysis (GSEAPreranked) was performed with genes down-regulated by both ESRP2 and Arkadia in OS-RC-2 cells using oncogenic signatures c6 gene sets in MSigDB. Gene sets with more than or equal to 1.5 NES values are shown in the list. NES: normalized enrichment score.

| Gene sets                  | NES  |
|----------------------------|------|
| 1 SRC_UP.V1_DN             | 2    |
| 2 WNT_UP.V1_UP             | 1.97 |
| 3 CRX_DN.V1_DN             | 1.96 |
| 4 PTEN_DN.V2_UP            | 1.92 |
| 5 MYC_UP.V1_DN             | 1.91 |
| 6 TBK1.DN.48HRS_UP         | 1.91 |
| 7 SNF5_DN.V1_UP            | 1.91 |
| 8 KRAS.600_UP.V1_UP        | 1.9  |
| 9 E2F3_UP.V1_DN            | 1.88 |
| 10 EIF4E_UP                | 1.87 |
| 11 PRC2_EZH2_UP.V1_DN      | 1.87 |
| 12 PRC2_EZH2_UP.V1_UP      | 1.87 |
| 13 CAHOY_ASTROGLIAL        | 1.86 |
| 14 GCNP_SHH_UP_EARLY.V1_DN | 1.84 |
| 15 IL2_UP.V1_DN            | 1.82 |
| 16 PRC2_SUZ12_UP.V1_UP     | 1.8  |
| 17 ATF2_UP.V1_DN           | 1.79 |
| 18 HOXA9_DN.V1_DN          | 1.79 |
| 19 CAHOY_OLIGODENDROCUTIC  | 1.78 |
| 20 NOTCH_DN.V1_UP          | 1.78 |
| 21 CSR_LATE_UP.V1_UP       | 1.76 |
| 22 BMI1_DN.V1_UP           | 1.75 |
| 23 PDGF_ERK_DN.V1_DN       | 1.74 |
| 24 RPS14_DN.V1_DN          | 1.73 |
| 25 ESC_J1_UP_EARLY.V1_UP   | 1.72 |
| 26 GCNP_SHH_UP_EARLY.V1_UP | 1.71 |
| 27 EIF4E_DN                | 1.69 |
| 28 AKT_UP.V1_UP            | 1.68 |
| 29 E2F3_UP.V1_UP           | 1.67 |
| 30 CYCLIN_D1_KE_V1_UP      | 1.66 |
| 31 PDGF_UP.V1_UP           | 1.65 |
| 32 E2F1_UP.V1_UP           | 1.65 |
| 33 KRAS.DF.V1_UP           | 1.64 |
| 34 PIGF_UP.V1_DN           | 1.63 |
| 35 AKT_UP_MTOR_DN.V1_UP    | 1.63 |
| 36 RB_P107_DN.V1_DN        | 1.62 |
| 37 MEL18_DN.V1_UP          | 1.62 |
| 38 RB_DN.V1_UP             | 1.61 |
| 39 MTOR_UP.N4.V1_UP        | 1.61 |
| 40 ESC_J1_UP_LATE.V1_UP    | 1.61 |
| 41 MEK_UP.V1_DN            | 1.61 |
| 42 VEGF_A_UP.V1_DN         | 1.6  |
| 43 DCA_UP.V1_DN            | 1.59 |
| 44 JNK_DN.V1_DN            | 1.59 |
| 45 CSR_EARLY_UP.V1_UP      | 1.58 |
| 46 MEK_UP.V1_UP            | 1.57 |
| 47 PRC2_EDD_UP.V1_UP       | 1.56 |
| 48 E2F1_UP.V1_DN           | 1.55 |
| 49 ERB2_UP.V1_UP           | 1.53 |
| 50 GCNP_SHH_UP_LATE.V1_UP  | 1.5  |
