# Supplementary material for: The Arkadia-ESRP2 axis suppresses tumor progression: analyses in clear-cell renal cell carcinoma
Source: PubMed Central journal article supplement — Oncogene. 2015 Nov 2;35(27):3514–23. doi: 10.1038/onc.2015.412 (PMC5399154; doi:10.1038/onc.2015.412), 2015-11-02
Supplement: onc2015412x4.pdf [file onc2015412x4.pdf]

Supplementary Table S3: Gene sets enriched in genes down-regulated by ESRP2 and Arkadia in OS-RC-2 cells.

Pre-ranked gene set enrichment analysis (GSEAPreranked) was performed with genes down-regulated by both ESRP2 and Arkadia in OS-RC-2 cells using GO biological process c5 BP gene sets in MSigDB. Gene sets with more than or equal to 1.5 NES values are shown in the list. NES: normalized enrichment score.

| Gene sets                                                          | NES  |
|--------------------------------------------------------------------|------|
| 1 DEPHOSPHORYLATION                                                | 1.99 |
| 2 REGULATION_OF_BINDING                                            | 1.97 |
| 3 REGULATION_OF_HYDROLASE_ACTIVITY                                 | 1.96 |
| 4 NEGATIVE_REGULATION_OF_CATALYTIC_ACTIVITY                        | 1.96 |
| 5 REGULATION_OF_MULTICELLULAR_ORGANISMAL_PROCESS                   | 1.94 |
| 6 MRNA_PROCESSING_GO_0006397                                       | 1.94 |
| 7 REGULATION_OF_DNA_BINDING                                        | 1.93 |
| 8 TRANSMEMBRANE_RECEPTOR_PROTEIN_TYROSINE_KINASE_SIGNALING_PATHWAY | 1.92 |
| 9 COENZYME_METABOLIC_PROCESS                                       | 1.9  |
| 10 ORGAN_MORPHOGENESIS                                             | 1.87 |
| 11 SENSORY_PERCEPTION                                              | 1.86 |
| 12 MRNA_METABOLIC_PROCESS                                          | 1.85 |
| 13 AMINO_ACID_METABOLIC_PROCESS                                    | 1.85 |
| 14 ACTIN_CYTOSKELETON_ORGANIZATION_AND_BIOGENESIS                  | 1.83 |
| 15 NEUROGENESIS                                                    | 1.82 |
| 16 ALCOHOL_METABOLIC_PROCESS                                       | 1.81 |
| 17 CENTRAL_NERVOUS_SYSTEM_DEVELOPMENT                              | 1.81 |
| 18 DEFENSE_RESPONSE                                                | 1.8  |
| 19 POSITIVE_REGULATION_OF_CELL_PROLIFERATION                       | 1.8  |
| 20 REGULATION_OF_CELLULAR_COMPONENT_ORGANIZATION_AND_BIOGENESIS    | 1.79 |
| 21 COFACTOR_METABOLIC_PROCESS                                      | 1.78 |
| 22 CELLULAR_PROTEIN_CATABOLIC_PROCESS                              | 1.78 |
| 23 NEGATIVE_REGULATION_OF_CELL_PROLIFERATION                       | 1.78 |
| 24 RNA_SPLICING                                                    | 1.78 |
| 25 RESPONSE_TO_WOUNDING                                            | 1.76 |
| 26 ACTIN_FILAMENT_BASED_PROCESS                                    | 1.76 |
| 27 PROTEIN_RNA_COMPLEX_ASSEMBLY                                    | 1.75 |
| 28 ENZYME_LINKED_RECEPTOR_PROTEIN_SIGNALING_PATHWAY                | 1.74 |
| 29 AMINO_ACID_AND_DERIVATIVE_METABOLIC_PROCESS                     | 1.74 |
| 30 REGULATION_OF_CELLULAR_PROTEIN_METABOLIC_PROCESS                | 1.73 |
| 31 CELLULAR_CARBOHYDRATE_METABOLIC_PROCESS                         | 1.72 |
| 32 NEGATIVE_REGULATION_OF_RNA_METABOLIC_PROCESS                    | 1.71 |
| 33 REGULATION_OF_PROTEIN_METABOLIC_PROCESS                         | 1.7  |
| 34 GROWTH                                                          | 1.68 |
| 35 CELL_CELL_SIGNALING                                             | 1.68 |
| 36 POSITIVE_REGULATION_OF_CATALYTIC_ACTIVITY                       | 1.67 |
| 37 PROTEIN_CATABOLIC_PROCESS                                       | 1.66 |
| 38 RESPONSE_TO ABIOTIC_STIMULUS                                    | 1.66 |
| 39 CELLULAR_MACROMOLECULE_CATABOLIC_PROCESS                        | 1.66 |
| 40 REGULATION_OF_KINASE_ACTIVITY                                   | 1.65 |
| 41 IMMUNE_SYSTEM_PROCESS                                           | 1.65 |
| 42 RIBONUCLEOPROTEIN_COMPLEX_BIOGENESIS_AND_ASSEMBLY               | 1.64 |
| 43 AMINE_METABOLIC_PROCESS                                         | 1.63 |
| 44 REGULATION_OF_PROTEIN_KINASE_ACTIVITY                           | 1.63 |
| 45 CARBOHYDRATE_METABOLIC_PROCESS                                  | 1.61 |
| 46 NITROGEN_COMPOUND_METABOLIC_PROCESS                             | 1.61 |
| 47 REGULATION_OF_TRANSFERASE_ACTIVITY                              | 1.6  |
| 48 CYTOSKELETON_ORGANIZATION_AND_BIOGENESIS                        | 1.58 |
| 49 RESPONSE_TO_EXTERNAL_STIMULUS                                   | 1.57 |

|    |                                                                                          |      |
|----|------------------------------------------------------------------------------------------|------|
| 50 | NEUROLOGICAL_SYSTEM_PROCESS                                                              | 1.56 |
| 51 | MACROMOLECULE_CATABOLIC_PROCESS                                                          | 1.54 |
| 52 | POSITIVE_REGULATION_OF_METABOLIC_PROCESS                                                 | 1.54 |
| 53 | ANTI_APOPTOSIS                                                                           | 1.53 |
| 54 | CELL_CYCLE_PHASE                                                                         | 1.53 |
| 55 | BIOPOLYMER_CATABOLIC_PROCESS                                                             | 1.53 |
| 56 | PROTEOLYSIS                                                                              | 1.53 |
| 57 | NEGATIVE_REGULATION_OF_NUCLEOBASENUCLEOSIDENUCLEOTIDE_AND_NUCLEIC_ACID_METABOLIC_PROCESS | 1.51 |
