# Supplementary material for: The Arkadia-ESRP2 axis suppresses tumor progression: analyses in clear-cell renal cell carcinoma
Source: PubMed Central journal article supplement — Oncogene. 2015 Nov 2;35(27):3514–23. doi: 10.1038/onc.2015.412 (PMC5399154; doi:10.1038/onc.2015.412), 2015-11-02
Supplement: onc2015412x5.pdf [file onc2015412x5.pdf]

Supplementary Table S4: Gene sets enriched in genes up-regulated by ESRP2 and Arkadia in OS-RC-2 cells.

Pre-ranked gene set enrichment analysis (GSEAPreranked) was performed with genes up-regulated by both ESRP2 and Arkadia in OS-RC-2 cells using GO biological process c5 BP gene sets in MSigDB. Gene sets with more than or equal to 1.5 NES values are shown in the list. NES: normalized enrichment score.

| Gene sets                                                       | NES  |
|-----------------------------------------------------------------|------|
| 1 PROTEIN_PROCESSING                                            | 2.24 |
| 2 PROTEIN_CATABOLIC_PROCESS                                     | 2.22 |
| 3 PROTEIN_IMPORT                                                | 2.17 |
| 4 TRANSMEMBRANE_RECEPTOR_PROTEIN_TYROSINE_KINASE_SIGNALING_PATH | 2.17 |
| 5 NUCLEAR_IMPORT                                                | 2.15 |
| 6 GLYCOPROTEIN_METABOLIC_PROCESS                                | 2.12 |
| 7 NEUROGENESIS                                                  | 2.11 |
| 8 RESPONSE_TO_ABIOTIC_STIMULUS                                  | 2.11 |
| 9 VIRAL_REPRODUCTION                                            | 2.1  |
| 10 MEMBRANE_ORGANIZATION_AND_BIOGENESIS                         | 2.07 |
| 11 NUCLEOCYTOPLASMIC_TRANSPORT                                  | 2.06 |
| 12 NITROGEN_COMPOUND_METABOLIC_PROCESS                          | 2.02 |
| 13 PROTEIN_TARGETING                                            | 2.01 |
| 14 NUCLEAR_TRANSPORT                                            | 2.01 |
| 15 CELL_MIGRATION                                               | 2    |
| 16 VIRAL_REPRODUCTIVE_PROCESS                                   | 2    |
| 17 ENZYME_LINKED_RECEPTOR_PROTEIN_SIGNALING_PATHWAY             | 1.98 |
| 18 ANTI_APOPTOSIS                                               | 1.98 |
| 19 CELLULAR_MACROMOLECULE_CATABOLIC_PROCESS                     | 1.97 |
| 20 BIOPOLYMER_CATABOLIC_PROCESS                                 | 1.95 |
| 21 ACTIN_FILAMENT_BASED_PROCESS                                 | 1.95 |
| 22 GENERATION_OF_PRECURSOR_METABOLITES_AND_ENERGY               | 1.94 |
| 23 G_PROTEIN_COUPLED_RECEPTOR_PROTEIN_SIGNALING_PATHWAY         | 1.91 |
| 24 REPRODUCTIVE_PROCESS                                         | 1.85 |
| 25 MACROMOLECULE_CATABOLIC_PROCESS                              | 1.84 |
| 26 ACTIN_CYTOSKELETON_ORGANIZATION_AND_BIOGENESIS               | 1.79 |
| 27 INTRACELLULAR_PROTEIN_TRANSPORT                              | 1.79 |
| 28 POSITIVE_REGULATION_OF_CATALYTIC_ACTIVITY                    | 1.78 |
| 29 NEGATIVE_REGULATION_OF_APOPTOSIS                             | 1.77 |
| 30 NEGATIVE_REGULATION_OF_PROGRAMMED_CELL_DEATH                 | 1.76 |
| 31 HOMEOSTATIC_PROCESS                                          | 1.74 |
| 32 PROTEIN_TRANSPORT                                            | 1.72 |
| 33 PROTEOLYSIS                                                  | 1.71 |
| 34 ORGAN_MORPHOGENESIS                                          | 1.69 |
| 35 ESTABLISHMENT_OF_PROTEIN_LOCALIZATION                        | 1.67 |
| 36 REPRODUCTION                                                 | 1.66 |
| 37 NEGATIVE_REGULATION_OF_CELL_PROLIFERATION                    | 1.65 |
| 38 CELLULAR_CATABOLIC_PROCESS                                   | 1.65 |
| 39 NEGATIVE_REGULATION_OF_DEVELOPMENTAL_PROCESS                 | 1.64 |
| 40 DNA_REPAIR                                                   | 1.63 |
| 41 POSITIVE_REGULATION_OF_CELL_PROLIFERATION                    | 1.62 |
| 42 CATABOLIC_PROCESS                                            | 1.62 |
| 43 IMMUNE_SYSTEM_PROCESS                                        | 1.59 |
| 44 CELL_CELL_SIGNALING                                          | 1.58 |
| 45 PROTEIN_LOCALIZATION                                         | 1.58 |
| 46 PROTEIN_AMINO_ACID_PHOSPHORYLATION                           | 1.57 |
| 47 CYTOSKELETON_ORGANIZATION_AND_BIOGENESIS                     | 1.53 |
| 48 MACROMOLECULE_LOCALIZATION                                   | 1.52 |
| 49 PHOSPHORYLATION                                              | 1.51 |

50 ANATOMICAL\_STRUCTURE\_MORPHOGENESIS  
51 NERVOUS\_SYSTEM\_DEVELOPMENT

1.51  
1.5
