# Supplementary material for: The Arkadia-ESRP2 axis suppresses tumor progression: analyses in clear-cell renal cell carcinoma
Source: PubMed Central journal article supplement — Oncogene. 2015 Nov 2;35(27):3514–23. doi: 10.1038/onc.2015.412 (PMC5399154; doi:10.1038/onc.2015.412), 2015-11-02
Supplement: onc2015412x6.pdf [file onc2015412x6.pdf]

Supplementary Table S5

| Primer for qRT-PCR |                          |                         |
|--------------------|--------------------------|-------------------------|
| Gene               | Forward                  | Reverse                 |
| GAPDH              | GAAGGTGAAGGTCGGAGTC      | GAAGATGGTGATGGGATTC     |
| ESRP1              | CAATATTGCCAAGGGAGGTG     | GTCCCATGTGATGTTTGTG     |
| ESRP2              | TGCCACAGAGGATGACTTTG     | ATTGACTGCTGGGCTCTTTG    |
| Arkadia            | CCACATAGGATGCACCCAAAC    | AATCCCAGTTCCCAGGCA      |
| SLK exon 13        | GAAGGAGGTTATAAATGAAG     | CCTGAGCATGCTGGCTTTGTG   |
| SLK total          | GCTGCTGCAAAAGTGATTGA     | CTACTGCTCCACCTGCACAA    |
| ITGA6 exon 27      | GTGGCTATTCTCGCTGGGATC    | GCCTCTCTTTATCAGATGGC    |
| ITGA6 total        | TCAATTGCTGGAAACATGGA     | GGCGGAGGTCAATTCTGTTA    |
| TSC2 exon 27       | TCTGAGGATAGCCAGACCCC     | GCTGCAGAGCTCTCCTTGAA    |
| TSC2 total         | GGTCCTCAGAGCCCTCTTCT     | AGGACAAGCCAACATCCATC    |
| ENAH exon 11a      | AGCCTGTAACCTTAAGGCC      | GAATCATAGGACCTGTTGTC    |
| ENAH total         | CCTGCCTCTGTTGAGACTCC     | GAGGGCTACTGAAGCCTGTG    |
| Smad7              | TGCAACCCCATCACCTTAG      | GACAGTCTGCAGTTGGTTTGAGA |
| NRP1               | CATTGCTCGTTCCCCTCCTT     | TGTTTCTGGACCCGTTGGAG    |
| GCLM               | ACCCTTTTCCTAAGTAGGATTTGT | GCCCGGGCAGATTTACATA     |
| HBEGF              | AGCCTCCAGTGGAAAATCG      | CACGATGACCAGCAGACAGA    |
| PPP2CB             | TATCGTTGTGGGAACCAGGC     | GCGCTGGGTCAAATTGAAGG    |
